# Supplementary material for: Comparison of the gut microbiotas of laboratory and wild Asian house shrews (Suncus murinus) based on cloned 16S rRNA sequences
Source: PubMed Central journal article supplement — Exp Anim. 2019 Jun 19;68(4):531–9. doi: 10.1538/expanim.19-0021 (PMC6842809; doi:10.1538/expanim.19-0021), 2019-06-19
Supplement: expanim-68-531-s001.pdf [file expanim-68-531-s001.pdf]

**Supplementary Table 1.** Genus-level classification of the bacterial 16S rRNA gene sequences in the large (LI) and small (SI) intestinal contents from the laboratory *Suncus murinus* and wild *Suncus murinus*.

| Phylum                  | Family                | Genus                              | Laboratory |     | Wild |     |
|-------------------------|-----------------------|------------------------------------|------------|-----|------|-----|
|                         |                       |                                    | LI         | SI  | LI   | SI  |
| Actinobacteria          | Actinomycetaceae      | <i>Actinomyces</i>                 | 0          | 3   | 0    | 0   |
|                         | Corynebacteriaceae    | <i>Corynebacterium</i>             | 0          | 8   | 0    | 0   |
|                         | PeM15_fa              | PeM15_ge                           | 0          | 0   | 1    | 0   |
|                         | Propionibacteriaceae  | Propionibacteriaceae_unclassified  | 0          | 8   | 0    | 0   |
| Total in Actinobacteria |                       |                                    | 0          | 19  | 1    | 0   |
| Firmicutes              | Staphylococcaceae     | <i>Staphylococcus</i>              | 0          | 0   | 0    | 1   |
|                         | Enterococcaceae       | <i>Enterococcus</i>                | 3          | 11  | 9    | 7   |
|                         |                       | <i>Vagococcus</i>                  | 3          | 0   | 22   | 6   |
|                         | Streptococcaceae      | <i>Lactococcus</i>                 | 0          | 0   | 22   | 48  |
|                         |                       | <i>Streptococcus</i>               | 69         | 136 | 0    | 5   |
|                         | Clostridiaceae_1      | <i>Clostridium_sensu_stricto_1</i> | 10         | 0   | 9    | 17  |
|                         |                       | <i>Clostridium_sensu_stricto_7</i> | 0          | 3   | 0    | 0   |
|                         | Lachnospiraceae       | <i>Tyzzerella_3</i>                | 0          | 0   | 1    | 0   |
|                         | Peptostreptococcaceae | <i>Paeniclostridium</i>            | 37         | 0   | 16   | 11  |
|                         |                       | <i>Paraclostridium</i>             | 0          | 0   | 2    | 2   |
|                         |                       | Peptostreptococcaceae_unclassified | 0          | 0   | 1    | 0   |
|                         |                       | <i>Romboutsia</i>                  | 8          | 2   | 33   | 39  |
|                         | Erysipelotrichaceae   | <i>Terrisporobacter</i>            | 0          | 0   | 0    | 3   |
|                         |                       | <i>Turicibacter</i>                | 0          | 0   | 1    | 0   |
| Total in Firmicutes     |                       |                                    | 130        | 152 | 116  | 139 |
| Fusobacteria            | Fusobacteriaceae      | <i>Fusobacterium</i>               | 0          | 0   | 0    | 1   |
| Total in Fusobacterium  |                       |                                    | 0          | 0   | 0    | 1   |
| Proteobacteria          | Hyphomicrobiaceae     | <i>Pedomicrobium</i>               | 0          | 0   | 1    | 0   |
|                         | Aeromonadaceae        | <i>Aeromonas</i>                   | 0          | 0   | 2    | 0   |
|                         | Cardiobacteriaceae    | uncultured_Cardiobacteriaceae      | 1          | 0   | 0    | 0   |
|                         | Diplorickettsiaceae   | uncultured_Diplorickettsiaceae     | 0          | 0   | 0    | 1   |
|                         | Enterobacteriaceae    | <i>Citrobacter</i>                 | 0          | 0   | 9    | 6   |
|                         |                       | <i>Enterobacter</i>                | 0          | 0   | 0    | 6   |
|                         |                       | Enterobacteriaceae_unclassified    | 0          | 0   | 10   | 9   |
|                         |                       | <i>Escherichia-Shigella</i>        | 45         | 3   | 12   | 11  |
|                         |                       | <i>Kluyvera</i>                    | 0          | 0   | 2    | 1   |
|                         |                       | <i>Lelliottia</i>                  | 0          | 0   | 3    | 0   |
|                         |                       | <i>Morganella</i>                  | 0          | 0   | 1    | 1   |
|                         |                       | <i>Plesiomonas</i>                 | 0          | 0   | 34   | 37  |
|                         |                       | <i>Pseudocitrobacter</i>           | 0          | 0   | 2    | 0   |
|                         |                       | <i>Raoultella</i>                  | 0          | 0   | 0    | 1   |
| <i>Salmonella</i>       | 0                     | 0                                  | 1          | 1   |      |     |
| Total in Proteobacteria |                       |                                    | 46         | 3   | 77   | 74  |
| Tenericutes             | Mycoplasmataceae      | <i>Mycoplasma</i>                  | 0          | 0   | 1    | 0   |
| Total in Tenericutes    |                       |                                    | 0          | 0   | 1    | 0   |
| Total sequences         |                       |                                    | 176        | 174 | 195  | 214 |
